# Supplementary material for: A comprehensive understanding of water photooxidation on Ag3PO4 surfaces
Source: Royal Society of Chemistry journal article supplement (doi:10.1039/c7ra02853a), 2017-01-01
Supplement: c7ra02853a1.pdf [file c7ra02853a1.pdf]

**Supporting Information for**  
**A Comprehensive Understanding of Water**  
**Photooxidation on Ag<sub>3</sub>PO<sub>4</sub> Surfaces**

Zuju Ma,<sup>1</sup> Sen Lin,<sup>2</sup> Rongjian Sa,<sup>1</sup> Qiaohong Li<sup>1</sup> and Kechen Wu<sup>1,a)</sup>

<sup>1</sup> *State Key Laboratory of Structural Chemistry, Fujian Institute of Research on the  
Structure of Matter, Chinese Academy of Sciences, Fuzhou 350002, China*

<sup>2</sup> *State Key Laboratory of photocatalysis on Energy and Environment, College of  
Chemistry, Fuzhou University, Fuzhou 350002, China*

---

<sup>a)</sup> Author to whom correspondence should be addressed. Electronic mail: [wkc@fjirsm.ac.cn](mailto:wkc@fjirsm.ac.cn).

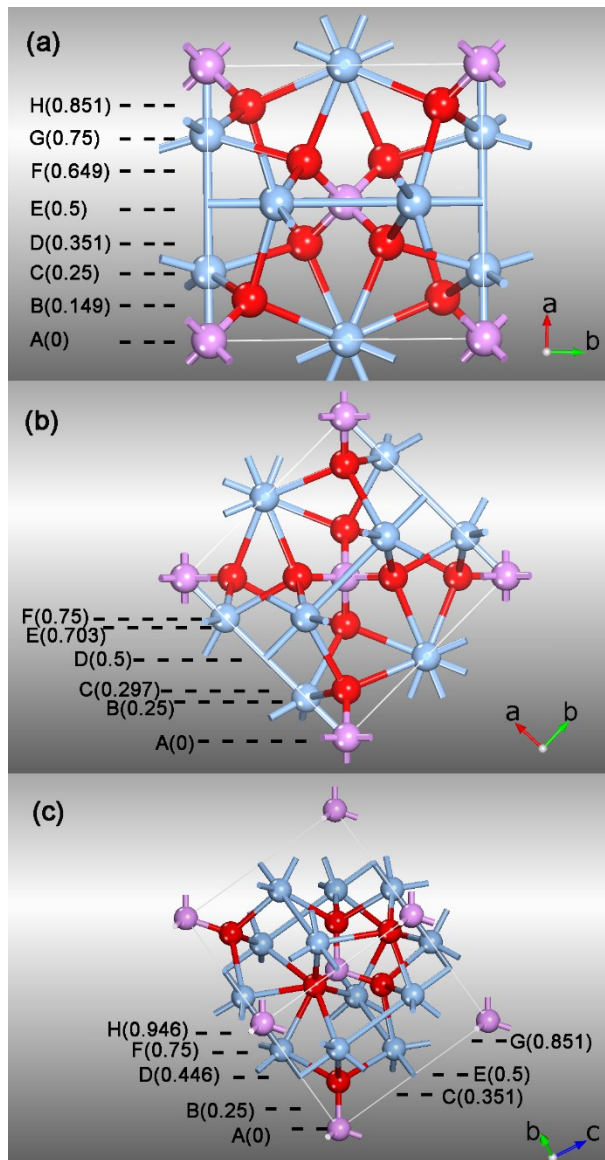

Fig.S1. The sliced terminations of a cubic  $\text{Ag}_3\text{PO}_4$  crystal at vertical  $[100]$  (a),  $[110]$  (b), and  $[111]$  (c) direction.

Table S1. The total energies (E: eV) and formation energies ( $E_f$  : J/m<sup>2</sup> ) of surface-terminated models depicted in Fig.S1. The surface was modeled using a period slab with a vacuum space of 15 Å in the direction of surface normal and a thickness that contains six Ag<sub>3</sub>PO<sub>4</sub> units.

| 100         |          |       | 110         |          |        | 111      |           |       |
|-------------|----------|-------|-------------|----------|--------|----------|-----------|-------|
| Top         | E        | $E_f$ | Top         | E        | $E_f$  | Top      | E         | $E_f$ |
| A: 0        | -244.660 | 1.917 | A: 0        | -246.974 | 1.002  | A: 0     | -248.254  | 0.659 |
| B:<br>0.149 | -251.957 | 0.341 | B: 0.25     | -244.867 | 1.324  | B: 0.25  | -246.903  | 0.827 |
| C: 0.25     | -251.961 | 0.340 | C:<br>0.297 | -251.064 | 0.3776 | C: 0.351 | -238.349  | 1.894 |
| D:<br>0.351 | -244.656 | 1.918 | D: 0.5      | -251.062 | 0.3779 | D: 0.446 | -240.662  | 1.605 |
| E: 0.5      | -244.656 | 1.918 | E: 0.703    | -244.866 | 1.324  | E: 0.5   | -248.2597 | 0.658 |
| F: 0.649    | -251.949 | 0.343 | F: 0.75     | -246.972 | 1.003  | F: 0.75  | -246.902  | 0.827 |
| G: 0.75     | -251.981 | 0.336 |             |          |        | G: 0.851 | -238.341  | 1.895 |
| H:<br>0.851 | -244.661 | 1.919 |             |          |        | H: 0.946 | -248.2598 | 0.658 |

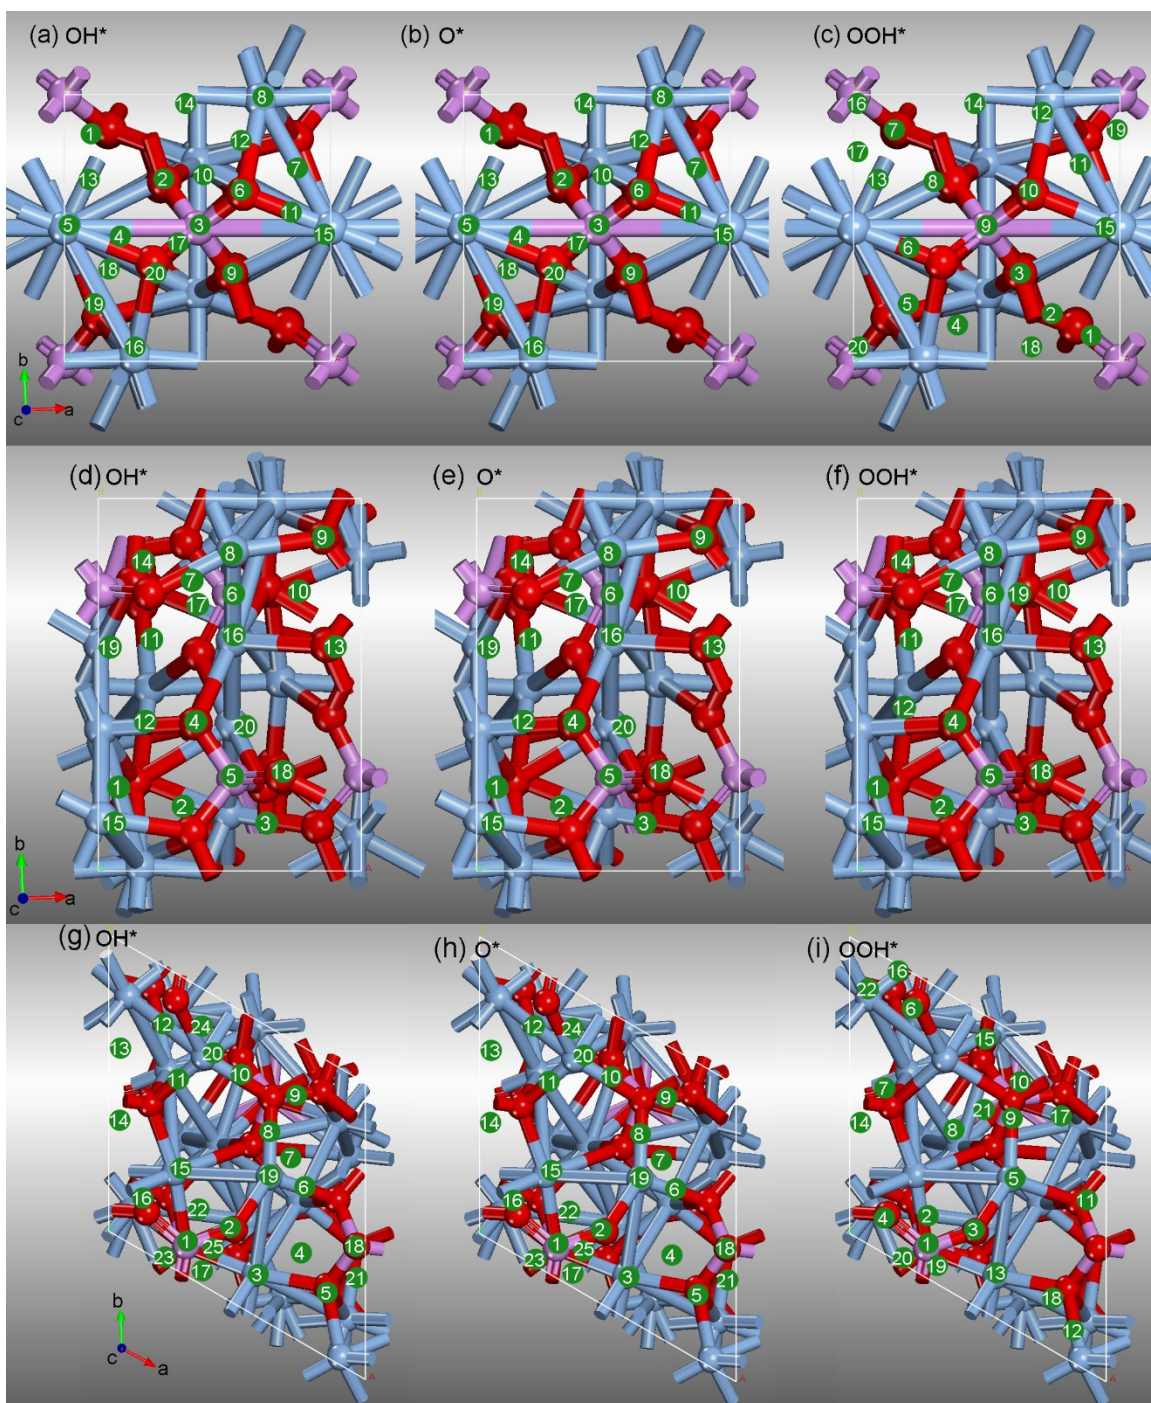

Fig.S2. The initial adsorption sites for relevant species ( $\text{OH}^*$ ,  $\text{O}^*$  and  $\text{OOH}^*$ ) during OER on  $\text{Ag}_3\text{PO}_4$  (100) (a-c), (110) (d-f) and (111) (g-i) surfaces.

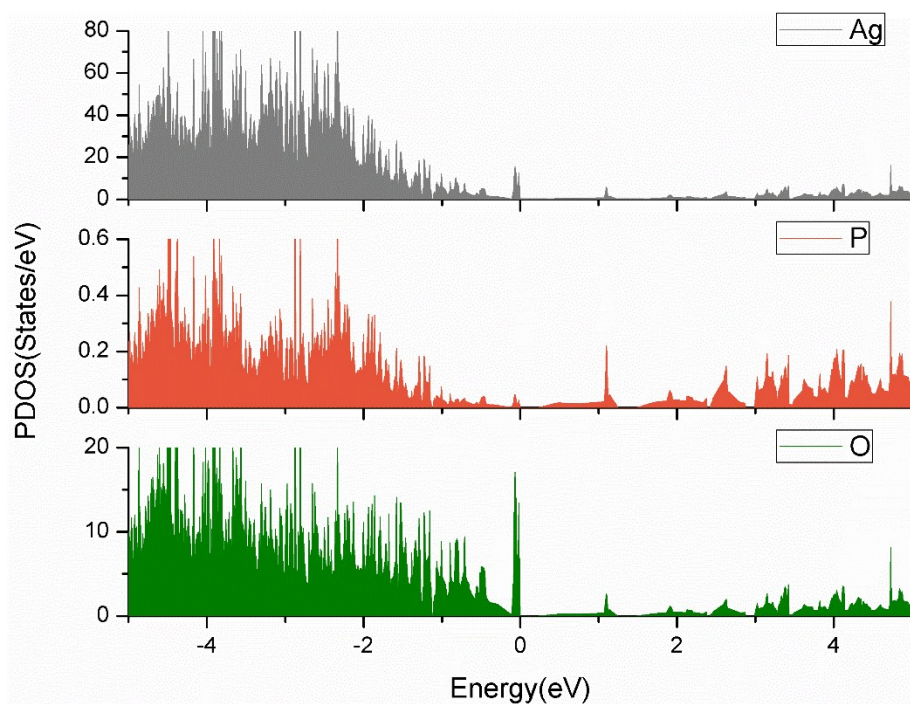

Fig.S3. Partial DOS of the  $\text{Ag}_3\text{PO}_4$  (100) surface.

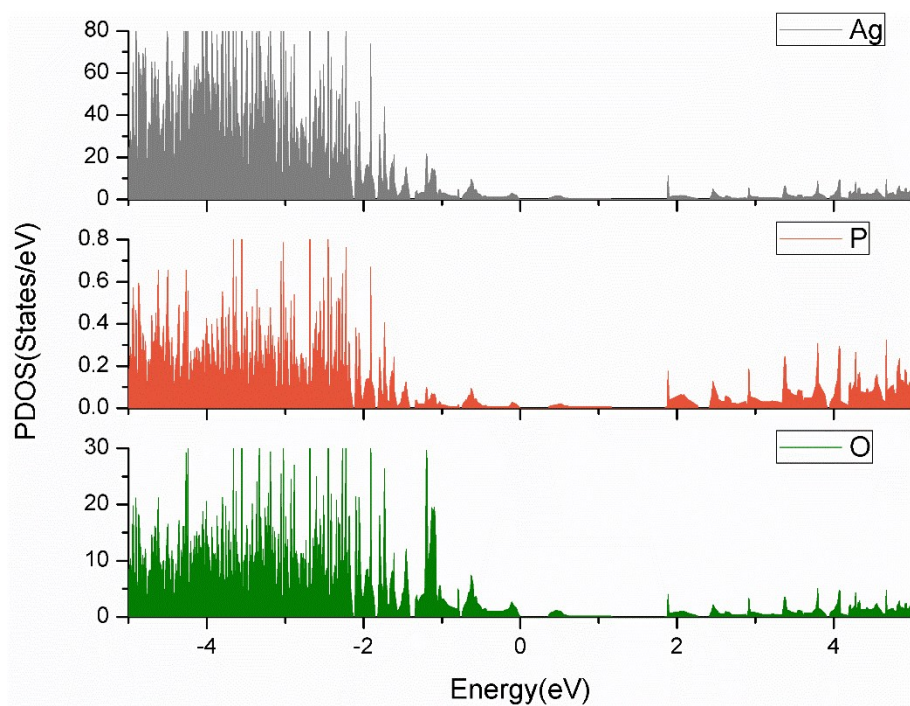

Fig.S4. Partial DOS of the  $\text{Ag}_3\text{PO}_4$  (110) surface.

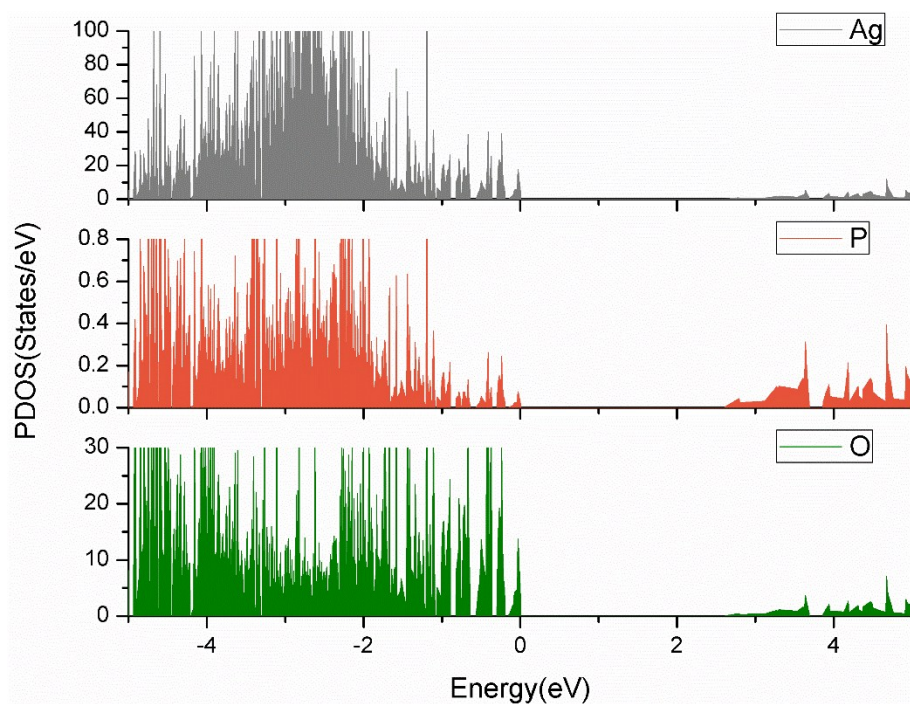

Fig.S5. Partial DOS of the  $\text{Ag}_3\text{PO}_4$  (111) surface.

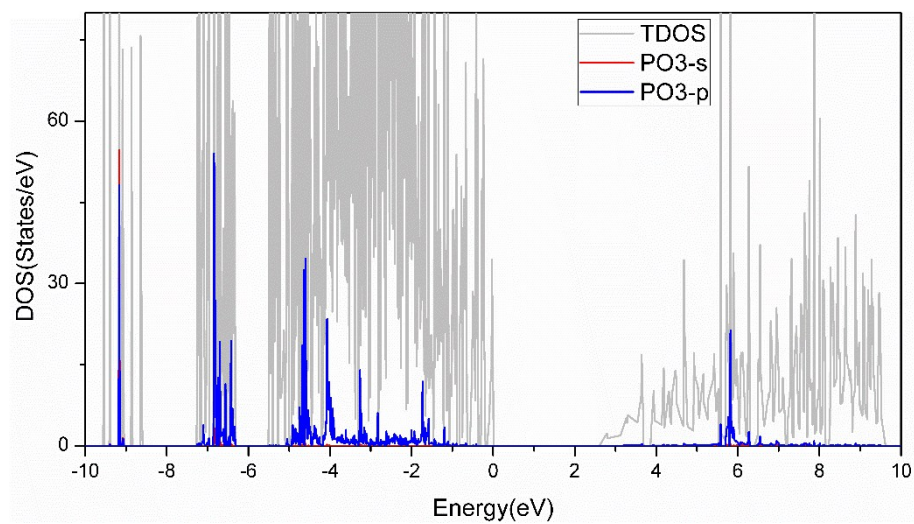

Fig. S6. Total DOS of (111) surface (TDOS) and partial DOS of [PO3] unit on the top layer of (111) surface

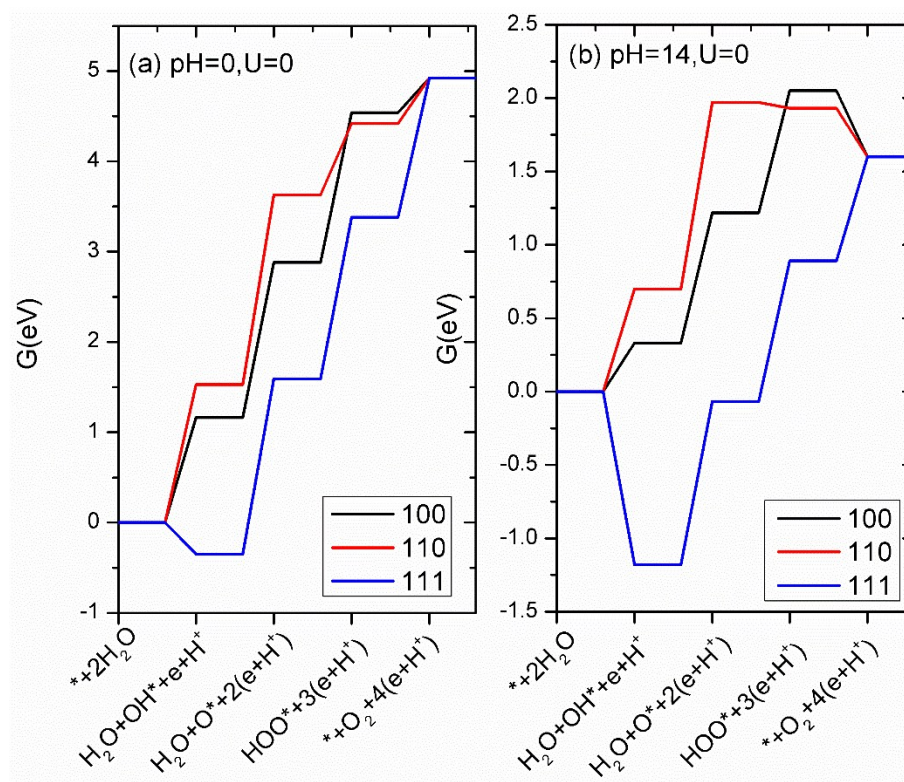

Fig. S7. The free energies of the intermediates on the  $\text{Ag}_3\text{PO}_4$  surfaces following mechanism I at  $\text{pH} = 0$  (a), and  $\text{pH}=14$  (b).
